# Supplementary material
Source: PubMed Central journal article supplement (PMC8091906)
Supplement: NIHMS1693607-supplement-Supplementary_Figurese.pdf [file NIHMS1693607-supplement-Supplementary_Figurese.pdf]

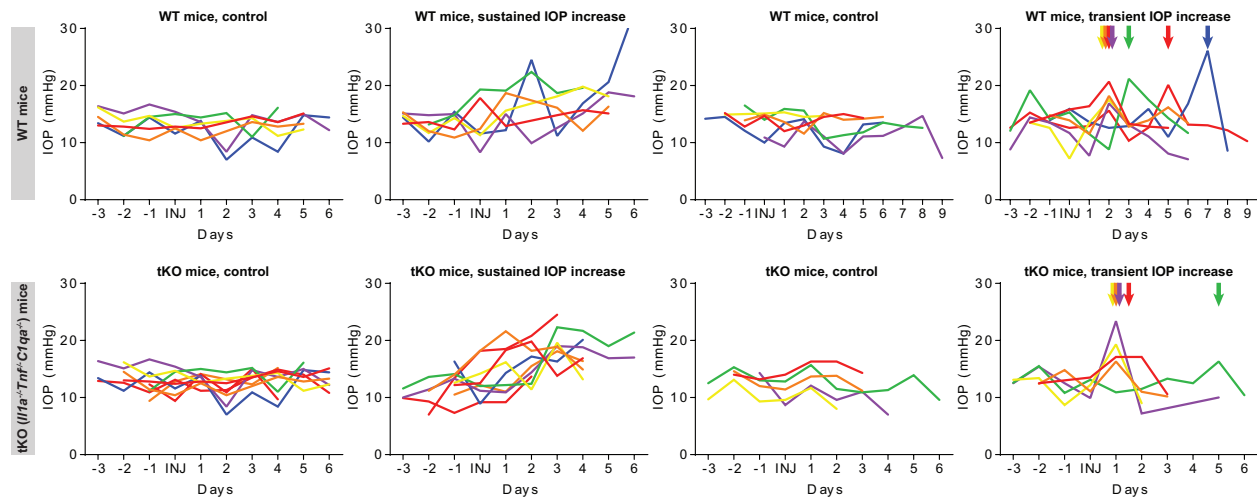

**FIGURE S1. Intraocular pressure measurements for individual animals, Related to Figure 2.** In wildtype (WT), and tKO (*Il1a<sup>-/-</sup>Tnf<sup>-/-</sup>C1qa<sup>-/-</sup>*) mice intraocular pressure (IOP) measurements were taken each day. Mice were split into two groups, those with sustained IOP increase (where IOP increased and remained high), and those with a transient increase (where IOP increased temporarily but then returned to normal levels). Each colored line represents an individual animal. Arrows highlight peak IOP increase in transient groups.

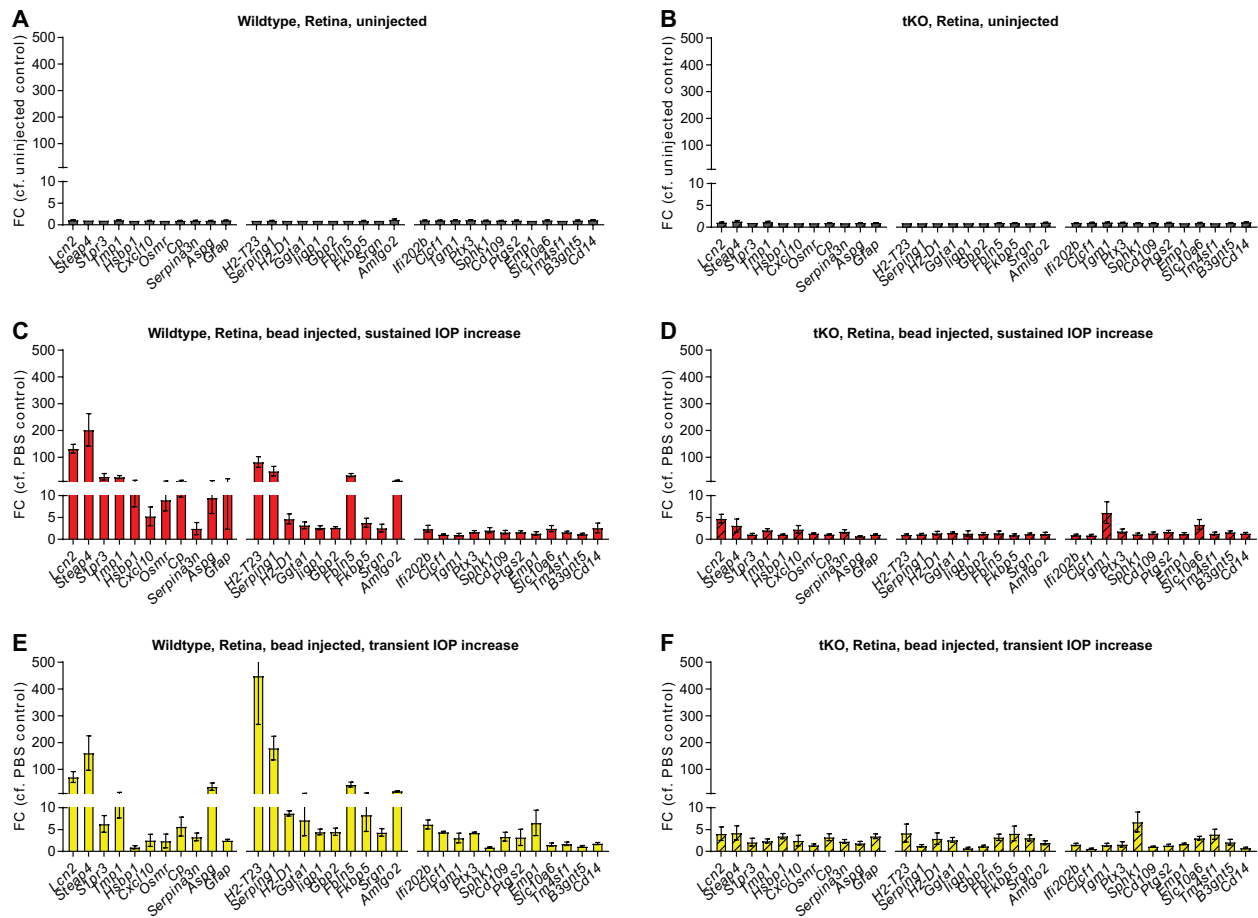

**FIGURE S2. Induction of reactive astrocyte transcripts in the retina following bead-injection glaucoma model in the mouse, Related to Figure 2. A-F** Microfluidic qPCR analysis of reactive astrocyte transcripts in whole retinas.  $n = 6-8$  individual animals per group. All data are mean  $\pm$  s.e.m.

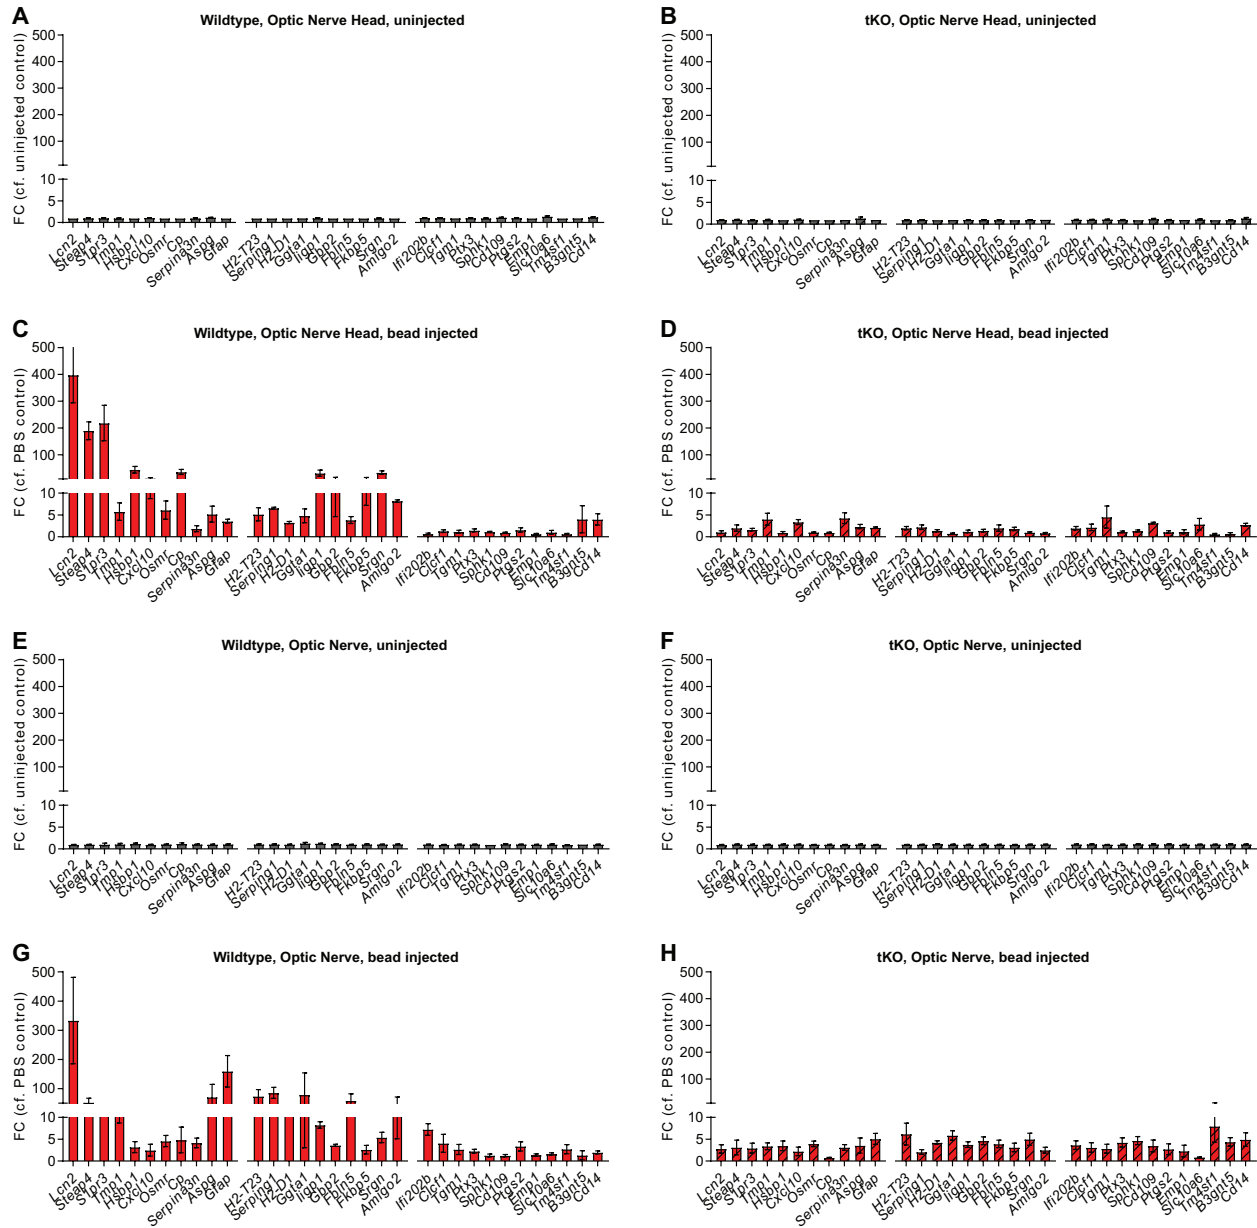

**FIGURE S3. Induction of reactive astrocyte transcripts in the optic nerve head and optic nerve following induction of bead-injection glaucoma model in the mouse, Related to Figure 2. A-F** Microfluidic qPCR analysis of reactive astrocyte transcripts in whole tissue sample of optic nerve head (A-D) and optic nerve (excluding optic nerve head, E-H).  $n = 6-8$  individual animals per group. All data are mean  $\pm$  s.e.m.
